# Supplementary material
Source: Springer Nature journal article supplement (https://www.springermedizin.de/resource/supplementary/12936_2012_2580_MOESM3_ESM.pdf/9543264)

Percentage  
of  
paraneoplasia

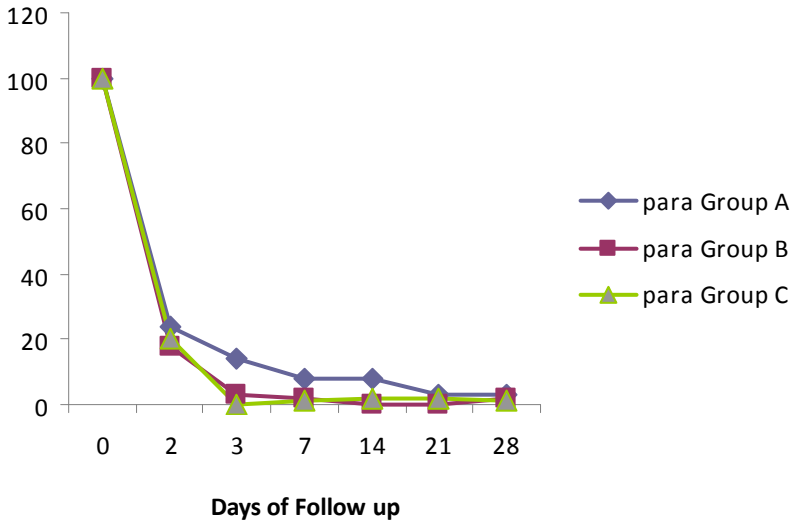

Supplement: MOESM3 [file 9543264]
